# Supplementary material
Source: Frontiers journal article supplement (https://www.frontiersin.org/articles/121115)
Supplement: downloadfile [file 121115]

**Appendix.** Estimated asymptotic covariance matrix of  $\hat{\rho}^* (\hat{V}_{\rho^*})$

Let  $z_a, z_b, z_d$ , and  $z_e$  be the typical variables. The typical elements of  $\hat{V}_{\rho^*}$  are of the following three types.

Case 1 - Variances of the odds-ratio approximations:  $\text{var}(\hat{\rho}_{ab}^*)$ ,

Case 2 - Covariances between approximations with one variable in common:  $\text{cov}(\hat{\rho}_{ab}^*, \hat{\rho}_{ad}^*)$ ,

Case 3 - Covariances between approximations with no variables in common:  $\text{cov}(\hat{\rho}_{ab}^*, \hat{\rho}_{de}^*)$ .

For Case 2 we require the following  $A \times B \times D$  contingency table. Let  $p = (p_1, \dots, p_8)'$  be the vector of sample cell probabilities from the three-way table, arranged as follows:

|     | D=0   |       |     | D=1   |       |
|-----|-------|-------|-----|-------|-------|
|     | B=0   | B=1   |     | B=0   | B=1   |
| A=0 | $p_1$ | $p_2$ | A=0 | $p_5$ | $p_6$ |
| A=1 | $p_3$ | $p_4$ | A=1 | $p_7$ | $p_8$ |

We assume multinomial sampling. Let  $P = \text{diag}(p)$  and let  $k = [1 \ -1 \ -1 \ 1]'$ . Let  $K_1$  be the  $4 \times 8$  0-1 matrix that collapses the  $A \times B \times D$  table into the two-way  $A \times B$  table, and let  $K_2$  be the matrix that collapses the  $A \times B \times D$  table into the  $A \times D$  table as shown below.

$$K_1 = \begin{bmatrix} 1 & 0 & 0 & 0 & 1 & 0 & 0 & 0 \\ 0 & 1 & 0 & 0 & 0 & 1 & 0 & 0 \\ 0 & 0 & 1 & 0 & 0 & 0 & 1 & 0 \\ 0 & 0 & 0 & 1 & 0 & 0 & 0 & 1 \end{bmatrix} \quad K_2 = \begin{bmatrix} 1 & 1 & 0 & 0 & 0 & 0 & 0 & 0 \\ 0 & 0 & 0 & 0 & 1 & 1 & 0 & 0 \\ 0 & 0 & 1 & 1 & 0 & 0 & 0 & 0 \\ 0 & 0 & 0 & 0 & 0 & 0 & 1 & 1 \end{bmatrix}.$$

Let  $D_1 = \text{diag}(K_1 p)$ ,  $D_2 = \text{diag}(K_2 p)$ , and  $D_p = \text{diag}(p_1, \dots, p_8)$ . Then,

$$\text{cov}(\log \hat{w}_{ab}, \log \hat{w}_{ad}) = k' D_1^{-1} K_1 D_p K_2' D_2^{-1} k \quad (1)$$

using results about multinomial distributions (e.g., Agresti, 2013), and  $\text{var}(\log \hat{w}_{ab})$  follows as a special case. Defining

$$d_{ab} = \frac{c\pi w_{ab}^c}{(w_{ab}^c + 1)^2} \sin \frac{\pi}{w_{ab}^c + 1}$$

where  $c$  is computed based on the marginal frequency table  $A \times B$  (the  $ab$  subscript is omitted from  $c$  for simplicity), we obtain via the delta method,

$$\text{cov}(\hat{\rho}_{ab}^*, \hat{\rho}_{ad}^*) = \hat{d}_{ab} \hat{d}_{ad} \text{cov}(\log \hat{w}_{ab}, \log \hat{w}_{ad}) \quad (2)$$

where the expression (1) needs to be substituted. The variance (Case 1) follows as a special case of (A2).

Case 3 is a straight-forward extension, and we omit the details. For this case, we require the four-way  $A \times B \times D \times E$  contingency table and redefine  $p = (p_1, \dots, p_{16})'$ . The matrices  $K_1$  and  $K_2$  are now  $4 \times 16$ , and so on. The covariance of the log-odds ratios is given by (1) with all the matrices appropriately redefined and

$$\text{cov}(\hat{\rho}_{ab}^*, \hat{\rho}_{de}^*) = \hat{d}_{ab} \hat{d}_{de} \text{cov}(\log \hat{w}_{ab}, \log \hat{w}_{de}). \quad (3)$$
